# Supplementary material
Source: publisher figshare collection journal article supplement (https://brill.figshare.com/ndownloader/files/17914301)
Supplement: Supplementary file 1 [file 17914301]

**Within-population morphological differences in the New World  
silverside *Odontesthes argentinensis* inhabiting two coastal lagoons  
of Uruguay (southwestern Atlantic)**

**Renzo Vettorazzi<sup>1,\*</sup>, Diego Nuñez<sup>1</sup> and Walter Norbis<sup>1</sup>**

<sup>1</sup>Laboratorio de Fisiología de la Reproducción y Ecología de Peces (FREPE), Departamento de Biología Animal,  
Instituto de Biología, Facultad de Ciencias, Igua 4225, Montevideo, 11400 Uruguay

Submitted: January 31, 2019. Final revision received: August 19, 2019. Accepted: October 5, 2019

\*<sup>1</sup>) Corresponding author; e-mail: rvetto@fcien.edu.uy

**Supplementary material**

**Table S1.**

Sample size of *Odontesthes argentinensis* collected from Rocha and Garzon Lagoons (RL and GL, respectively), Uruguay, in the months of March and July of 2015. The data are classified as male and female and each category is divided into adults (A) and juveniles (J).

|    | March |    |    |    | July |   |    |   |
|----|-------|----|----|----|------|---|----|---|
|    | ♂     |    | ♀  |    | ♂    |   | ♀  |   |
|    | A     | J  | A  | J  | A    | J | A  | J |
| RL | 16    | 13 | 19 | 10 | 14   | 7 | 30 | 2 |
| GL | 17    | 2  | 21 | 6  | 20   | 0 | 24 | 5 |
